# Supplementary material for: N–H⋯O and N–H⋯Cl supported 1D chains of heterobimetallic CuII/NiII–SnIV cocrystals
Source: Royal Society of Chemistry journal article supplement (doi:10.1039/c6dt03118h), 2016-01-01
Supplement: c6dt03118h1.pdf [file c6dt03118h1.pdf]

## Electronic Supplementary Information

for

### **N–H···O and N–H···Cl Supported 1D Chains of Heterobimetallic Cu<sup>II</sup>/Ni<sup>II</sup>–Sn<sup>IV</sup> Cocrystals**

Susanta Hazra,<sup>a,\*</sup> Ricardo Meyrelles,<sup>a</sup> Adilia Januário Charmier,<sup>a,b</sup> Patrícia Rijo,<sup>c,d</sup> M. Fátima C. Guedes da Silva<sup>a,\*</sup> and Armando J. L. Pombeiro<sup>a,\*</sup>

<sup>a</sup> Centro de Química Estrutural, Instituto Superior Técnico, Universidade de Lisboa, Av. Rovisco Pais, 1049–001, Lisbon, Portugal. E-mail: h.susanta@gmail.com; fatima.guedes@tecnico.ulisboa.pt and pombeiro@tecnico.ulisboa.pt

<sup>b</sup> ULHT, Universidade Lusófona, Campo Grande 376, Lisbon, 1749–024, Portugal

<sup>c</sup> Center for Research in Biosciences and Health Technologies (CBIOS), Universidade Lusófona de Humanidades e Tecnologias, 1749–024 Lisboa, Portugal

<sup>d</sup> Instituto de Investigação do Medicamento (iMed.U LISBOA), Faculdade de Farmácia, Universidade de Lisboa, 1649–003 Lisboa, Portugal

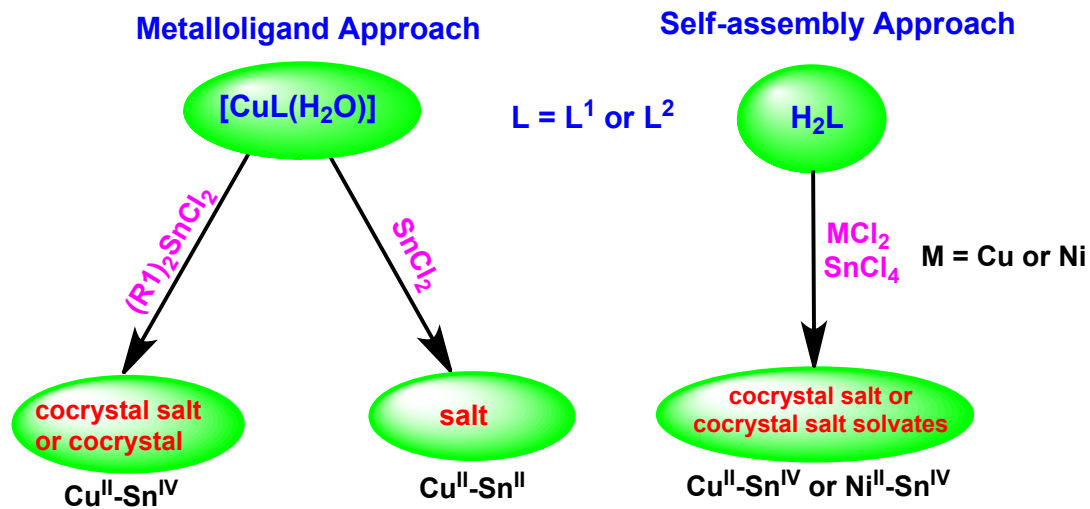

**Scheme S1** Preparation of cocrystals salts, cocrystals and salts by the metalloligand and the self-assembly approaches.

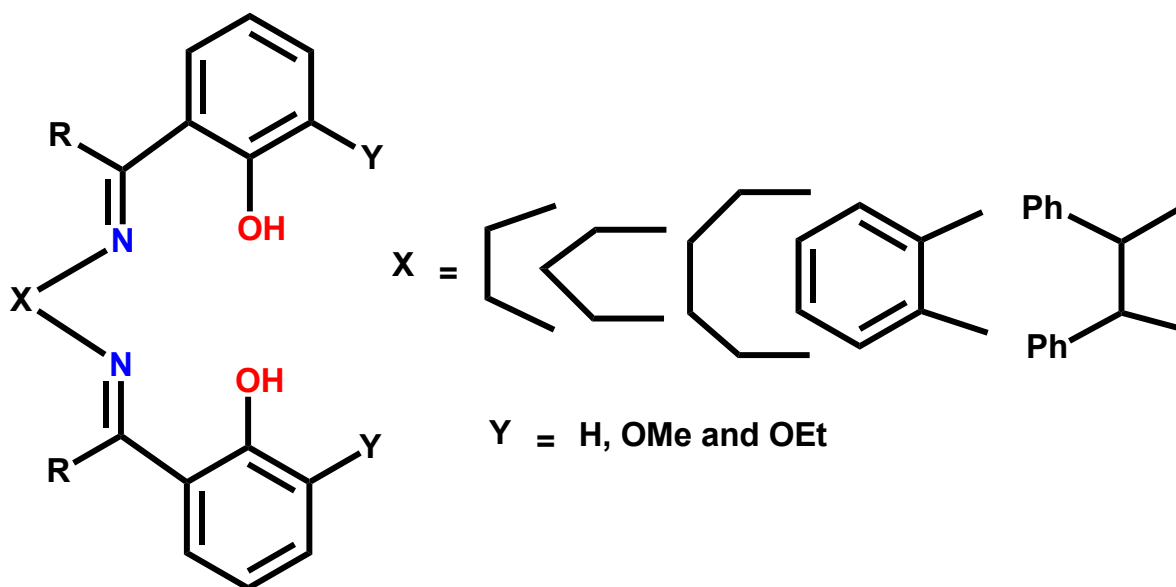

**Scheme S2.** Chemical diagram of a family of related H<sub>2</sub>L Schiff bases.

**Table S1** Hydrogen bonds distances (Å) and angles (°) in **1–4**

| Compounds | D–H···A                    | H···A | D···A | D–H···A | Symmetry                                           |
|-----------|----------------------------|-------|-------|---------|----------------------------------------------------|
| <b>1</b>  | N3–H3C···Cl2 <sup>i</sup>  | 2.32  | 3.201 | 172.0   | <i>i</i> ) x, y, 1+z                               |
|           | N3–H3A···O1                | 2.09  | 2.827 | 140.0   |                                                    |
|           | N3–H3B···O2                | 2.18  | 2.834 | 131.0   |                                                    |
|           | N3–H3A···O3                | 2.15  | 2.891 | 141.0   |                                                    |
|           | N3–H3B···O4                | 2.12  | 2.920 | 151.0   |                                                    |
| <b>2</b>  | N3–H3C···Cl3 <sup>i</sup>  | 2.44  | 3.259 | 157.0   | <i>i</i> ) x, 1+y, z;<br><i>ii</i> ) 1–x, 1–y, 1–z |
|           | N3–H3A···O1                | 2.01  | 2.760 | 143.0   |                                                    |
|           | N3–H3B···O2                | 2.13  | 2.803 | 135.0   |                                                    |
|           | N3–H3A···O3                | 2.13  | 2.856 | 139.0   |                                                    |
|           | N3–H3B···O4                | 2.12  | 2.880 | 147.0   |                                                    |
|           | O5–H5M···Cl3 <sup>ii</sup> | 2.474 | 3.316 | 162.0   |                                                    |
| <b>3</b>  | N3–H3C···Cl2               | 2.35  | 3.227 | 166.0   |                                                    |
|           | N3–H3A···O1                | 2.16  | 2.886 | 137.0   |                                                    |
|           | N3–H3B···O2                | 2.15  | 2.867 | 137.0   |                                                    |
|           | N3–H3A···O3                | 2.05  | 2.824 | 143.0   |                                                    |
|           | N3–H3B···O4                | 2.06  | 2.822 | 142.0   |                                                    |
| <b>4</b>  | N3–H3A···Cl2 <sup>i</sup>  | 2.52  | 3.301 | 148.0   | <i>i</i> ) 1–x, 1–y, –z                            |
|           | N3–H3A···O1                | 2.27  | 2.840 | 121.0   |                                                    |
|           | N3–H3B···O2                | 1.97  | 2.788 | 149.0   |                                                    |
|           | N3–H3A···O3                | 1.95  | 2.815 | 160.0   |                                                    |
|           | N3–H3B···O4                | 2.12  | 2.795 | 131.0   |                                                    |
|           | O5–H5M···Cl2               | 2.39  | 3.261 | 171.0   |                                                    |

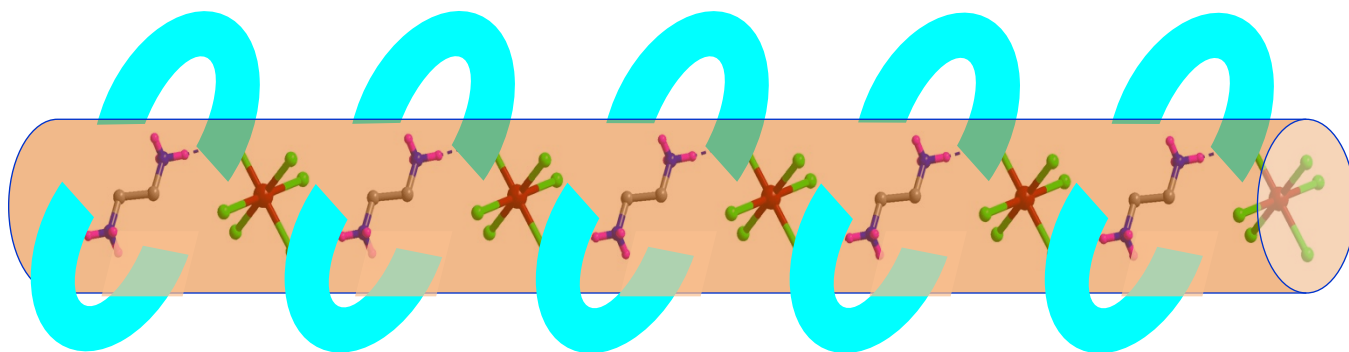**Fig. S1** Schematic presentation of the encapsulation of a chain of  $(\text{H}_2\text{ED})^{2+} \cdot [\text{SnCl}_6]^{2-}$  species in the metallo-Schiff base pockets of  $[\text{ML}]$ .

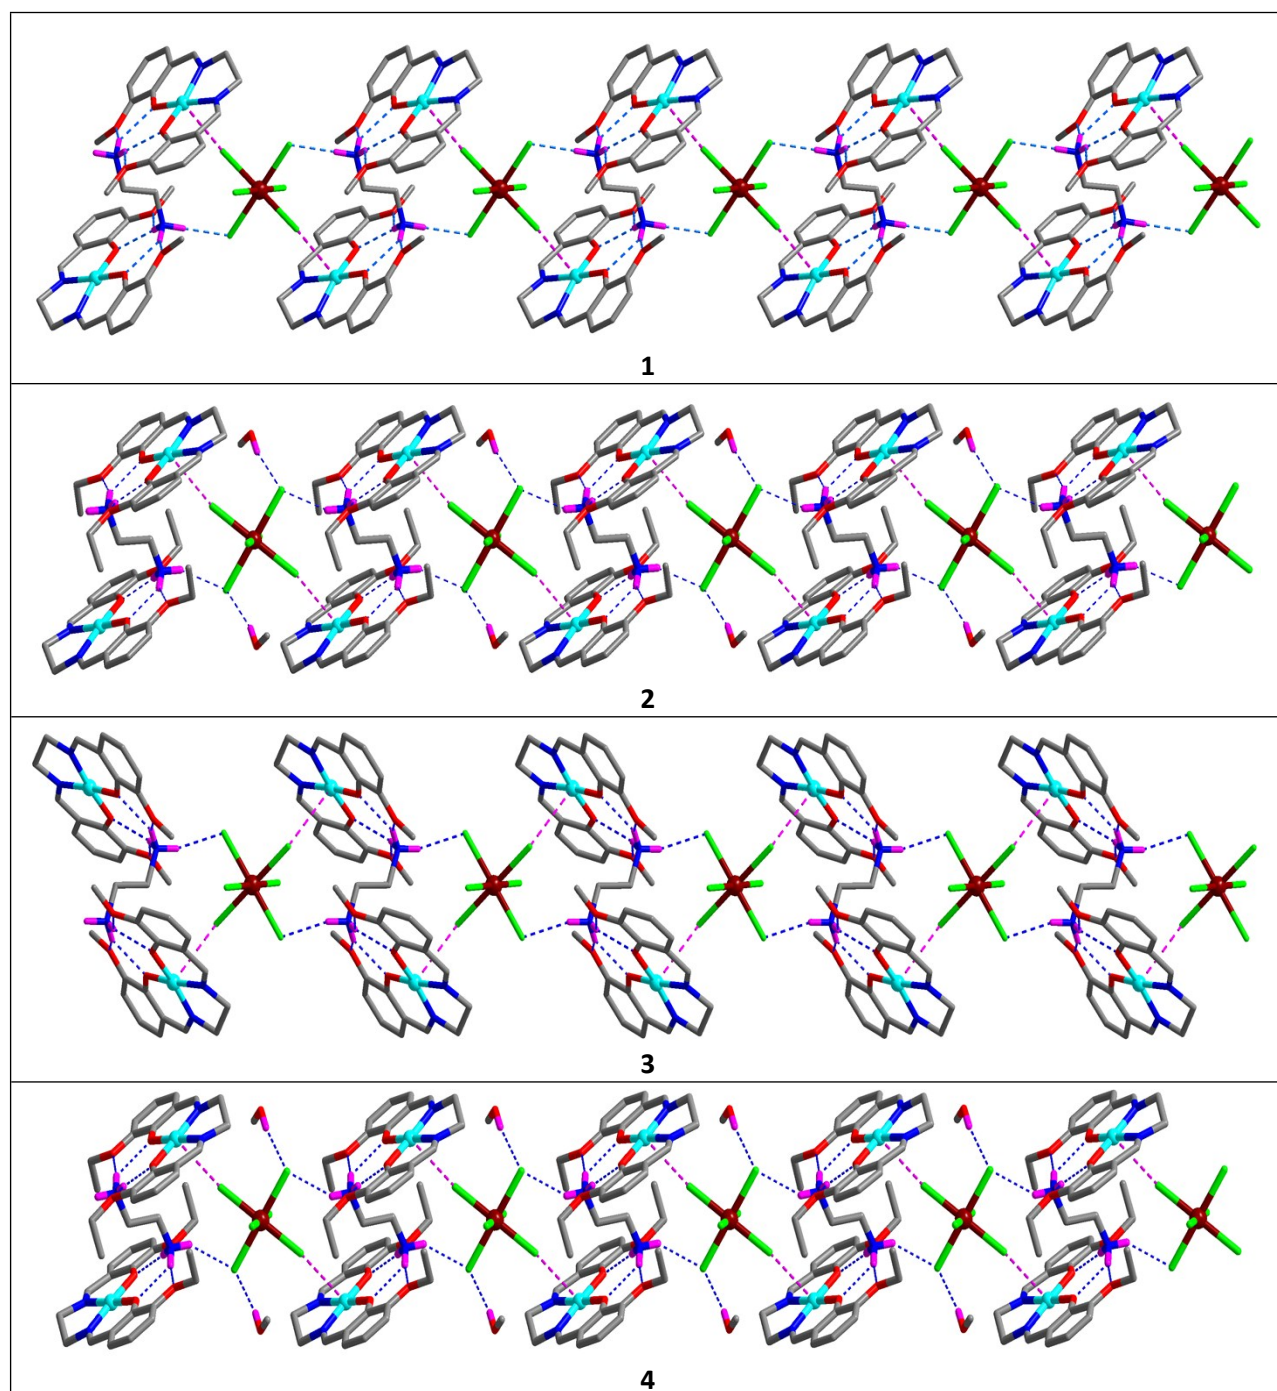

Fig. S2 Supramolecular 1D chain in 2–4 supported by non-covalent interactions.

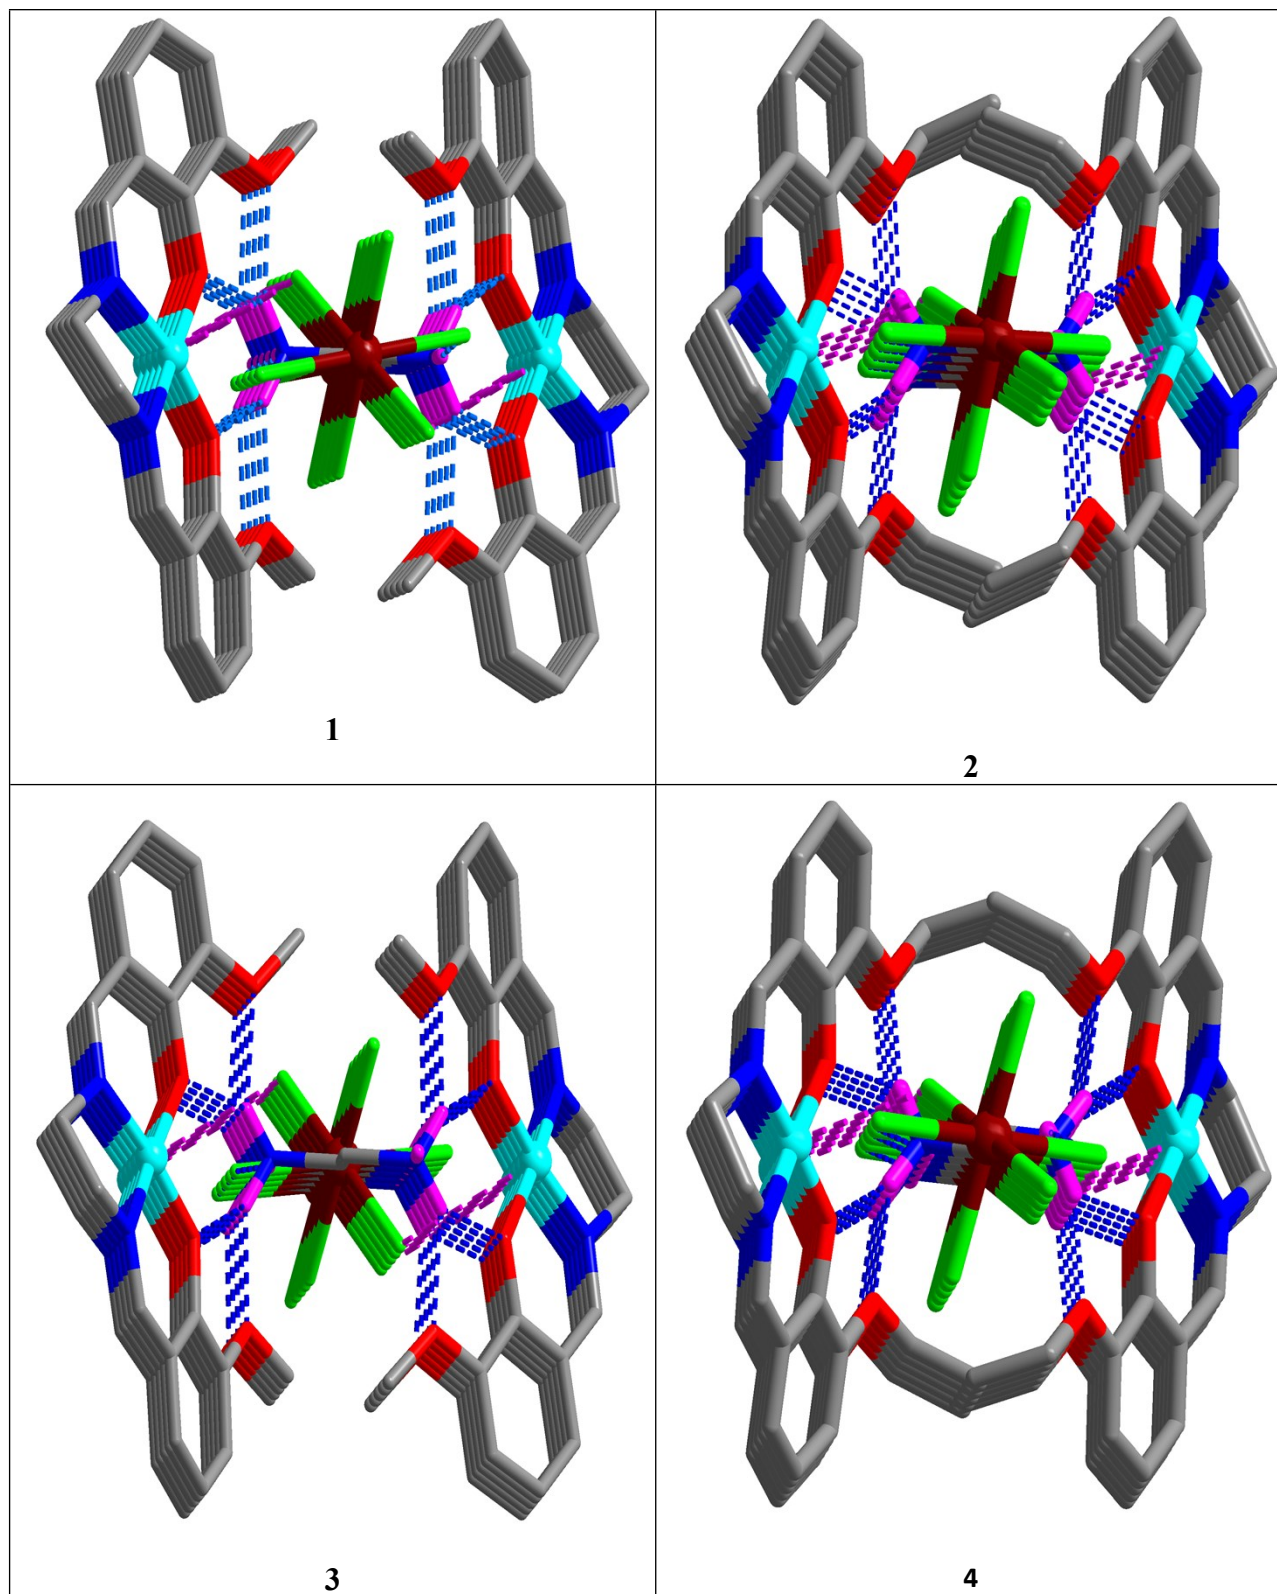

**Fig. S3** Entrapping of 1D chains of  $(\text{H}_2\text{ED})^{2+} \cdot [\text{SnCl}_6]^{2-}$  adducts by mononuclear complexes in **1**–**4**. Methanol molecules in **2** and **4** are omitted for clarity.

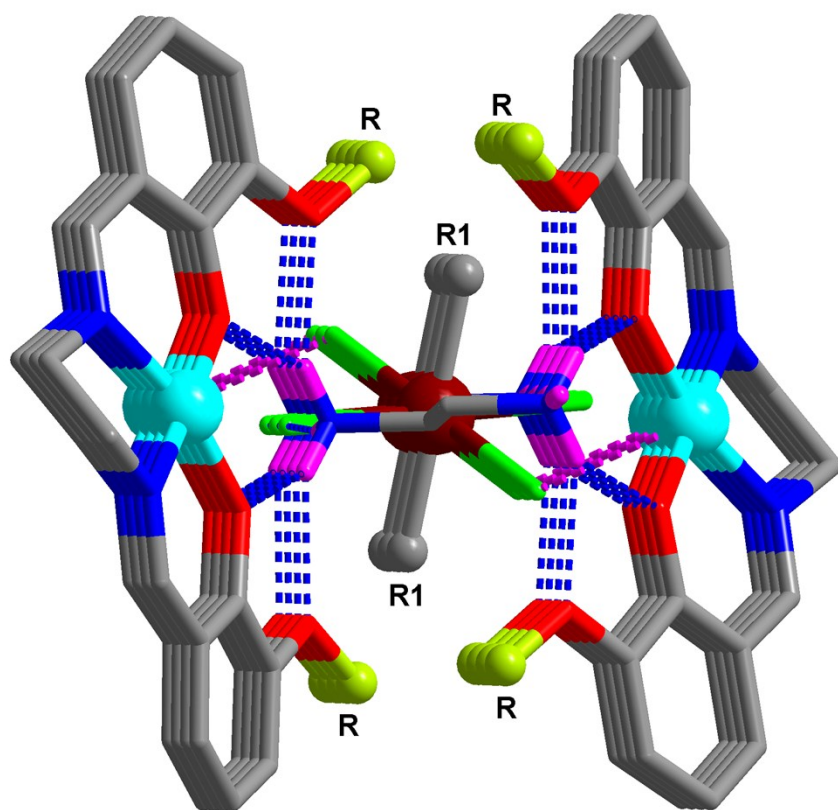

**Fig. S4** Entrapping of 1D chain of  $(\text{H}_2\text{ED})^{2+} \cdot [(\text{R}1)_2\text{SnCl}_4]^{2-}$  adducts by the mononuclear  $[\text{CuL}]$  complexes in  $(\text{H}_2\text{ED})^{2+} \cdot 2[\text{CuL}] \cdot [(\text{R}1)_2\text{SnCl}_4]^{2-}$  ( $\text{L} = \text{L}^1$ ,  $\text{R} = \text{Me}$ ,  $\text{R}1 = \text{Me}$ ,  $\text{Et}$ ,  $n\text{-Bu}$  and  $\text{Ph}$ ;  $\text{L} = \text{L}^2$ ,  $\text{R} = \text{Et}$ ,  $\text{R}1 = \text{Ph}$ ;  $\text{ED} = 1,2\text{-ethylenediamine}$ ; excluding the solvent of crystallization). (Reference 9c of the main text).

**Table S2** Crystallographic data for **1–4**

|                                                                                                                         | <b>1</b>                                                                                         | <b>2</b>                                                                                          | <b>3</b>                                                                                         | <b>4</b>                                                                                          |
|-------------------------------------------------------------------------------------------------------------------------|--------------------------------------------------------------------------------------------------|---------------------------------------------------------------------------------------------------|--------------------------------------------------------------------------------------------------|---------------------------------------------------------------------------------------------------|
| Formula                                                                                                                 | C <sub>38</sub> H <sub>46</sub> Cl <sub>6</sub> Cu <sub>2</sub> N <sub>6</sub> O <sub>8</sub> Sn | C <sub>44</sub> H <sub>62</sub> Cl <sub>6</sub> Cu <sub>2</sub> N <sub>6</sub> O <sub>10</sub> Sn | C <sub>38</sub> H <sub>46</sub> Cl <sub>6</sub> Ni <sub>2</sub> N <sub>6</sub> O <sub>8</sub> Sn | C <sub>44</sub> H <sub>62</sub> Cl <sub>6</sub> Ni <sub>2</sub> N <sub>6</sub> O <sub>10</sub> Sn |
| FW                                                                                                                      | 1173.28                                                                                          | 1293.46                                                                                           | 1163.62                                                                                          | 1283.80                                                                                           |
| Crystal system                                                                                                          | Triclinic                                                                                        | Triclinic                                                                                         | Triclinic                                                                                        | Triclinic                                                                                         |
| Space group                                                                                                             | <i>P</i> -1                                                                                      | <i>P</i> -1                                                                                       | <i>P</i> -1                                                                                      | <i>P</i> -1                                                                                       |
| <i>a</i> /Å                                                                                                             | 10.466(4)                                                                                        | 10.5572(4)                                                                                        | 10.4892(12)                                                                                      | 10.3172(4)                                                                                        |
| <i>b</i> /Å                                                                                                             | 11.006(5)                                                                                        | 11.5990(4)                                                                                        | 10.9238(12)                                                                                      | 11.7507(5)                                                                                        |
| <i>c</i> /Å                                                                                                             | 11.089(4)                                                                                        | 12.9106(5)                                                                                        | 11.1384(12)                                                                                      | 12.8219(6)                                                                                        |
| $\alpha$ /°                                                                                                             | 80.040(15)                                                                                       | 112.4350(10)                                                                                      | 90.216(4)                                                                                        | 114.355(2)                                                                                        |
| $\beta$ /°                                                                                                              | 62.536(18)                                                                                       | 111.101(2)                                                                                        | 117.436(4)                                                                                       | 108.037(2)                                                                                        |
| $\gamma$ /°                                                                                                             | 79.168(15)                                                                                       | 96.452(2)                                                                                         | 99.734(4)                                                                                        | 96.323(2)                                                                                         |
| <i>V</i> /Å <sup>3</sup>                                                                                                | 1107.7(8)                                                                                        | 1304.86(9)                                                                                        | 1111.5(2)                                                                                        | 1294.78(10)                                                                                       |
| <i>Z</i>                                                                                                                | 1                                                                                                | 1                                                                                                 | 1                                                                                                | 1                                                                                                 |
| <i>T</i> /K                                                                                                             | 298(2)                                                                                           | 150(2)                                                                                            | 298(2)                                                                                           | 150(2)                                                                                            |
| $\theta$ /°                                                                                                             | 2.266 – 26.478                                                                                   | 2.475 – 25.744                                                                                    | 2.229 – 25.692                                                                                   | 2.246 – 25.723                                                                                    |
| $\mu$ (Mo K $\alpha$ )/mm <sup>-1</sup>                                                                                 | 1.930                                                                                            | 1.650                                                                                             | 1.814                                                                                            | 1.568                                                                                             |
| $\rho_{\text{calcd}}$ /g cm <sup>-3</sup>                                                                               | 1.759                                                                                            | 1.646                                                                                             | 1.738                                                                                            | 1.646                                                                                             |
| <i>F</i> (000)                                                                                                          | 590                                                                                              | 658                                                                                               | 588                                                                                              | 656                                                                                               |
| Index ranges                                                                                                            | -13 < <i>h</i> < 13                                                                              | -12 < <i>h</i> < 12                                                                               | -12 < <i>h</i> < 12                                                                              | -12 < <i>h</i> < 12                                                                               |
|                                                                                                                         | -13 < <i>k</i> < 13                                                                              | -14 < <i>k</i> < 14                                                                               | -13 < <i>k</i> < 13                                                                              | -14 < <i>k</i> < 14                                                                               |
|                                                                                                                         | -13 < <i>l</i> < 13                                                                              | -15 < <i>l</i> < 15                                                                               | -13 < <i>l</i> < 13                                                                              | -15 < <i>l</i> < 15                                                                               |
| Rfs. collected                                                                                                          | 17669                                                                                            | 22907                                                                                             | 18140                                                                                            | 23394                                                                                             |
| Rfs. unique/observed                                                                                                    | 4531/ 3256                                                                                       | 4949/3918                                                                                         | 4215/2855                                                                                        | 4879/4091                                                                                         |
| <i>R</i> <sub>int</sub>                                                                                                 | 0.0732                                                                                           | 0.0488                                                                                            | 0.0842                                                                                           | 0.0312                                                                                            |
| <i>R</i> <sub>1</sub> <sup>a</sup> / w <i>R</i> <sub>2</sub> <sup>b</sup> [ <i>I</i> > 2 $\sigma$ ( <i>I</i> )]         | 0.0507/0.1106                                                                                    | 0.0292/0.0637                                                                                     | 0.0509/0.1094                                                                                    | 0.0267/0.0577                                                                                     |
| <i>R</i> <sub>1</sub> <sup>a</sup> / w <i>R</i> <sub>2</sub> <sup>b</sup> [for all <i>F</i> <sub>o</sub> <sup>2</sup> ] | 0.0815/0.1237                                                                                    | 0.0466/0.0696                                                                                     | 0.0930/0.1265                                                                                    | 0.0388/0.0629                                                                                     |
| GOF on <i>F</i> <sup>2</sup>                                                                                            | 1.026                                                                                            | 1.019                                                                                             | 1.033                                                                                            | 1.058                                                                                             |
